# Supplementary material for: High proton conductivity of sulfonated methoxyphenyl-containing poly(arylene ether ketone) for proton exchange membranes
Source: Royal Society of Chemistry journal article supplement (doi:10.1039/c5ra11486a), 2015-01-01
Supplement: c5ra11486a1.pdf [file c5ra11486a1.pdf]

Document: 20150728 (varioELcube) from: --.--.-- (modified)

varioELcube CHNS

Statistic report

---

| Name        | C[%]     | H[%] | N[%] | S[%]     |
|-------------|----------|------|------|----------|
| SMP-PAEK-60 | 45.99801 | 4.18 | 0.01 | 3.914724 |
| SMP-PAEK-70 | 45.88231 | 4.10 | 0.05 | 4.604676 |
| SMP-PAEK-80 | 45.76469 | 4.06 | 0.01 | 5.306051 |
| SMP-PAEK-90 | 45.64511 | 4.00 | 0.00 | 6.019136 |

---

Name: eassuperuser, Access: varioELcube superuser

2015/7/28 22:27:43

varioEL cube V2.0.3 (9395a42)2 011-01-27, CHNS Mode, Ser. No.: 19111001

Elementar Analysensysteme GmbH
